# Supplementary material for: Comparison of the effects of lockdown due to COVID-19 on glucose patterns among children, adolescents, and adults with type 1 diabetes: CGM study
Source: PubMed Central journal article supplement — BMJ Open Diabetes Res Care. 2020 Oct 28;8(2):e001664. doi: 10.1136/bmjdrc-2020-001664 (PMC7594202; doi:10.1136/bmjdrc-2020-001664), 2020-10-28
Supplement: bmjdrc-2020-001664supp001.pdf [file bmjdrc-2020-001664supp001.pdf]

1 **COMPARISON OF THE EFFECTS OF LOCKDOWN DUE TO COVID-19 ON GLUCOSE**  
 2 **PATTERNS AMONG CHILDREN, ADOLESCENTS, AND ADULTS WITH TYPE-1 DIABETES: A**  
 3 **CGM STUDY**

4  
 5 **SUPPLEMENTARY MATERIAL**

6 **Supplementary Table 1. Continuous glucose monitoring (CGM) parameters before and after**  
 7 **lockdown in Italy due to COVID-19 pandemic in the whole population.**

|                                              | <b>Pre-lockdown</b> | <b>Post-lockdown</b> | <b>P value</b> |
|----------------------------------------------|---------------------|----------------------|----------------|
| Sensor use, %                                | 95.6 (91.1-98.1)    | 95.7 (89.8-98)       | 0.201          |
| Mean glucose, mg/dL                          | 168 (152-191)       | 165 (146-182)        | <0.001         |
| Median glucose, mg/dL                        | 159 (142-188)       | 158 (140-172)        | <0.001         |
| Glucose Management indicator (GMI), %        | 7.4 (7-7.9)         | 7.3 (6.8-7.7)        | <0.001         |
| Glucose Management indicator (GMI), mmol/mol | 57 (52-63)          | 56 (51-60)           | <0.001         |
| Standard deviation (SDglu)                   | 63.3 (55.1-71)      | 59.9 (52-70.2)       | 0.002          |
| Percent coefficient of variation (%CV), %    | 36.8 (33.1-40.7)    | 36.3 (33.1-40.4)     | 0.491          |
| Time in range (TIR), %                       | 57.6 (44.2-65.5)    | 60 (52-67.6)         | <0.001         |
| Time below range 1 (TBR1), %                 | 1.9 (0.8-4.5)       | 1.7 (0.9-4.6)        | 0.131          |
| Time below range 2 (TBR2), %                 | 0.4 (0.1-1.2)       | 0.3 (0.1-1.1)        | 0.954          |
| Time above range 1 (TAR1), %                 | 26.8 (21.2-31.8)    | 26 (19.6-30.3)       | 0.002          |
| Time above range 2 (TAR2), %                 | 11.3 (5.4-19.2)     | 9.5 (4.3-16.3)       | 0.001          |
| Low blood glucose index (LBGI)               | 0.7 (0.3-1.4)       | 0.6 (0.3-1.4)        | 0.337          |
| High blood glucose index (HBGI)              | 8.6 (6.2-12.3)      | 8.1 (5.5-10.5)       | <0.001         |

Data are expressed as median with interquartile range in parentheses. TIR: time in range 70-180 mg/dL. TBR1: time below range 1 (54-69 mg/dL). TBR2: time below range 2 (<54 mg/dl). TAR1: time above range 1 (180-250 mg/dL). TAR2: time above range 2 (>250 mg/dL).

8

9

10

11

**Supplementary Table 2. Continuous glucose monitoring (CGM) parameters during the period January 30, 2020 - February 19, 2020 (School-open) and before lockdown (February 20, 2020 - March 10, 2020), when the schools have been closed, in Italy due to COVID-19 pandemic in children ( $\leq 12$  years), teenagers (13-17 years), and adults ( $\geq 18$  years).**

|                                              | Children ( $\leq 12$ years)<br>(n=30) |                                  |              | Teenagers (13-17 years)<br>(n=24) |                                  |              | Adults ( $\geq 18$ years)<br>(n=76) |                                  |         |
|----------------------------------------------|---------------------------------------|----------------------------------|--------------|-----------------------------------|----------------------------------|--------------|-------------------------------------|----------------------------------|---------|
|                                              | School-open                           | Pre-lockdown<br>(schools closed) | P value      | School open                       | Pre-lockdown<br>(schools closed) | P value      | School open                         | Pre-lockdown<br>(schools closed) | P value |
| Sensor use, %                                | 96.4 (87.2-98.4)                      | 96.5 (87.5-98.8)                 | 0.605        | 94.8 (88.2-98.4)                  | 97 (93.4-98.5)                   | 0.082        | 95.8 (90.1-97.9)                    | 95.1 (91-97.5)                   | 0.530   |
| Mean glucose, mg/dL                          | 171 (155-199)                         | 181 (161-206)                    | 0.753        | 167 (150-179)                     | 168 (141-180)                    | 0.273        | 166 (148-188.)                      | 164 (145-191)                    | 0.692   |
| Median glucose, mg/dL                        | 164 (146-192)                         | 171 (153-196)                    | 0.594        | 160 (141-173)                     | 157 (135-172)                    | 0.423        | 162 (143-181)                       | 159 (137-189)                    | 0.481   |
| Glucose Management indicator (GMI), %        | 7.4 (7-8.1)                           | 7.7 (7.2-8.3)                    | 0.753        | 7.3 (6.9-7.6)                     | 7.4 (6.7-7.6)                    | 0.273        | 7.3 (6.9-7.9)                       | 7.3 (6.8-7.9)                    | 0.692   |
| Glucose Management indicator (GMI), mmol/mol | 57 (53-65)                            | 60 (55-67)                       | 0.753        | 56 (52-59)                        | 57 (50-60)                       | 0.273        | 56 (52-62)                          | 56 (51-63)                       | 0.692   |
| Standard deviation (SDglu)                   | 65.6 (57.7-71.2)                      | 67.4 (58.6-74.8)                 | 0.538        | <b>62.6 (54.8-69.3)</b>           | <b>59.1 (48.6-66.9)</b>          | <b>0.041</b> | 62.5 (52.7-70.6)                    | 63 (54-70.9)                     | 0.586   |
| Percent coefficient of variation (%CV), %    | 35.4 (33.7-40)                        | 37.4 (33.4-40.4)                 | 0.913        | 37.6 (32.5-41.7)                  | 36.3 (32.4-41.6)                 | 0.211        | 36.8 (32-41.6)                      | 36.6 (33.1-41.8)                 | 0.709   |
| Time in range (TIR), %                       | 58.3 (43.8-66.7)                      | 53.3 (39.8-62)                   | 0.266        | 57.2 (52.2-70.9)                  | 61 (50.8-72.4)                   | 0.219        | 55.3 (45.5-65)                      | 57.7 (43.5-67.3)                 | 0.127   |
| Time below range 1 (TBR1), %                 | 1 (0.6-2.1)                           | 1.2 (0.7-2.7)                    | 0.719        | 2 (0.7-4.9)                       | 1.6 (0.6-4.9)                    | 0.452        | 2.9 (1.1-4.8)                       | 2.5 (1.1-5.4)                    | 0.507   |
| Time below range 2 (TBR2), %                 | 0.2 (0.1-0.5)                         | 0.4 (0-0.8)                      | 0.645        | 0.3 (0.1-1)                       | 0.2 (0-0.7)                      | 0.290        | 0.5 (0.1-1.8)                       | 0.4 (0.1-1.7)                    | 0.078   |
| Time above range 1 (TAR1), %                 | <b>25.5 (21.8-31.3)</b>               | <b>28.1 (25.1-31.0)</b>          | <b>0.047</b> | 26.9 (18.3-29.2)                  | 24.4 (17.5-34.4)                 | 0.524        | 26.8 (19.2-31.5)                    | 26.5 (19.3-31.7)                 | 0.169   |
| Time above range 2 (TAR2), %                 | 11.8 (8.3-23.1)                       | 14.5 (9-26.3)                    | 0.741        | 12.6 (5.1-14.6)                   | 9.6 (4.3-15.2)                   | 0.186        | 9.9 (4.5-18.5)                      | 11.1 (4.5-19)                    | 0.935   |
| Low blood glucose index (LBGI)               | 0.4 (0.3-0.8)                         | 0.5 (0.3-0.9)                    | 0.765        | 0.6 (0.3-1.4)                     | 0.7 (0.2-1.3)                    | 0.636        | 0.8 (0.4-1.8)                       | 0.8 (0.4-1.7)                    | 0.132   |
| High blood glucose index (HBGI)              | 9 (7-13.4)                            | 10.3 (7.5-15)                    | 0.792        | 9.1 (5.4-9.8)                     | 8.3 (5-10.1)                     | 0.204        | 8.3 (5.3-11.6)                      | 8.3 (5.4-12.2)                   | 0.518   |

Data are expressed as median with interquartile range in parentheses. P values refer to paired samples T-tests performed for each parameter in the three groups of patients divided by age range. CV: coefficient of variation. TIR: time in range 70-180 mg/dL. TBR1: time below range 1 (54-69 mg/dL). TBR2: time below range 2 (<54 mg/dl). TAR1: time above range 1 (180-250 mg/dL). TAR2: time above range 2 (>250 mg/dL).
